# Supplementary material for: Protocol for the ‘Virtual Traveller’ cluster-randomised controlled trial: a behaviour change intervention to increase physical activity in primary-school Maths and English lessons
Source: PubMed Central journal article supplement — BMJ Open. 2016 Jun 27;6(6):e011982. doi: 10.1136/bmjopen-2016-011982 (PMC4932281; doi:10.1136/bmjopen-2016-011982), 2016-06-27
Supplement: bmjopen-2016-011982supp_appendixA.pdf [file bmjopen-2016-011982supp_appendixA.pdf]

## Appendix A: Sample Maths Virtual Traveller session – M3: Maths True or False

### Slide 1

Welcome & provides summary of session

### Maths True or False?

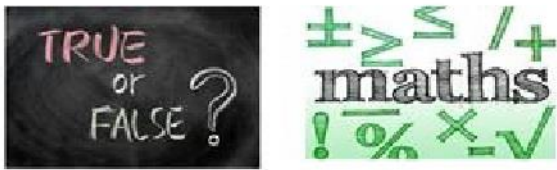

Time for a 10-question quiz visiting famous maths locations!  
Each statement has two movements, to show if you think it is true or false.  
Do the movement for the answer you think is correct!

### Slide 2

Video: Pupils jump along from space to first location

### Where in the world?

It's a long way down!  
Take some big BIG jumps from space to our first location on Earth!



### Slide 3

Questions: True response = jump rope on the spot  
False response = simulated football kicks

### Parthenon, Greece



Ancient Greece produced many famous Mathematicians such as Pythagoras who developed the 'Pythagoras theory'.

True or False?  
**True: Jump rope on the spot**  
**False: Football kick**

- 35 is in the 5 times table.
- Kai buys a calculator for £31 and a shirt for £67. He spends £96 altogether.
- A box holds 20 apples to feed horses. That means there are 220 apples in 10 boxes.

### Slide 4

Video: Pupils hop, skip and jump to next location

### A hop, skip and jump



Let's hop, skip and jump as fast as we can to the next location..

### Slide 5

Questions: True response = star jumps  
False response = hip circles

### Syracuse, Italy



Syracuse is a historical city on the island of Sicily near Italy. It was the birth and death-place of famous mathematician Archimedes.

True or False  
**True: Star jumps**  
**False: Hip circles**

4) Look at this table ----->  
This shows the final medal tally from the London 2012 Olympics. **76 medals separate the overall winners USA from Italy in 8<sup>th</sup>.**

| Rank | Country                    | Gold | Silver | Bronze | Total |
|------|----------------------------|------|--------|--------|-------|
| 1    | United States              | 45   | 29     | 29     | 104   |
| 2    | China                      | 38   | 27     | 23     | 88    |
| 3    | Great Britain & N. Ireland | 29   | 17     | 19     | 65    |
| 4    | Russian Federation         | 24   | 26     | 32     | 82    |
| 5    | South Korea                | 13   | 8      | 7      | 28    |
| 6    | Germany                    | 11   | 19     | 14     | 44    |
| 7    | France                     | 11   | 11     | 12     | 34    |

5) A pyramid is a 3D shape.

### Slide 6

Questions: True response = jog on-the-spot  
False response = high knees

### Syracuse, Italy

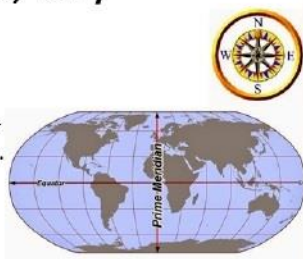

True or False  
**True: Jog on-the-spot**  
**False: High knees**

7) Look at the picture ----->  
**Australia is in the Western hemisphere.**

8) The time in New York, USA is five hours behind England's. If it is 1PM in England. it will be 8AM in New
